# Supplementary material for: Excited-State Dynamics of Proflavine after Intercalation into DNA Duplex
Source: MDPI journal article supplement (doi:10.3390/molecules27238157), 2022-11-23
Supplement: s1 [file s1]

## Supporting Materials

# Excited-State Dynamics of Proflavine after Intercalation into DNA Duplex

Jie Zhou <sup>1</sup>, Yanyan Jia <sup>2,\*</sup>, Xueli Wang <sup>1</sup>, Menghui Jia <sup>1</sup>, Haifeng Pan <sup>1</sup>, Zhenrong Sun <sup>1</sup> and Jinquan Chen <sup>1,3\*</sup>

- <sup>1</sup> State Key Laboratory of Precision Spectroscopy, East China Normal University, Shanghai 200241, China; 51200920043@stu.ecnu.edu.cn (J.Z.); xlwang@lps.ecnu.edu.cn (X.W.); mhjia@lps.ecnu.edu.cn (M.J.); hfp@phy.ecnu.edu.cn (H.P.); zrsun@phy.ecnu.edu.cn (Z.S.)
- <sup>2</sup> Key Laboratory for Advanced Materials and Feringa Nobel Prize Scientist Joint Research Center, Institute of Fine Chemicals, School of Chemistry & Molecular Engineering, East China University of Science and Technology, Shanghai 200237, China
- <sup>3</sup> Collaborative Innovation Center of Extreme Optics, Shanxi University, Taiyuan 030006, China
- \* Correspondence: jiayanyan@ecust.edu.cn (Y.J.); jqchen@lps.ecnu.edu.cn (J.C.)

### Additional TA Results

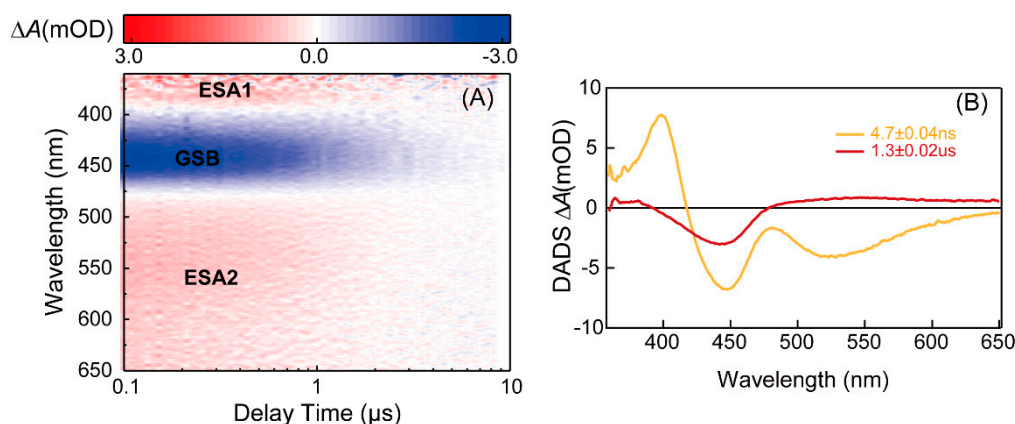

Figure S1. Nanosecond TA spectra and lifetime of proflavine.

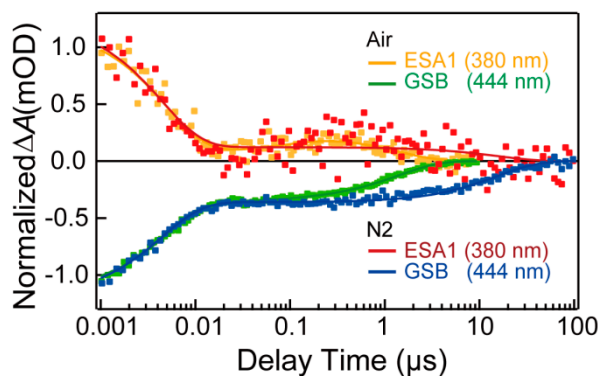

Figure S2. Comparison of proflavine lifetime before and after deoxygenation.

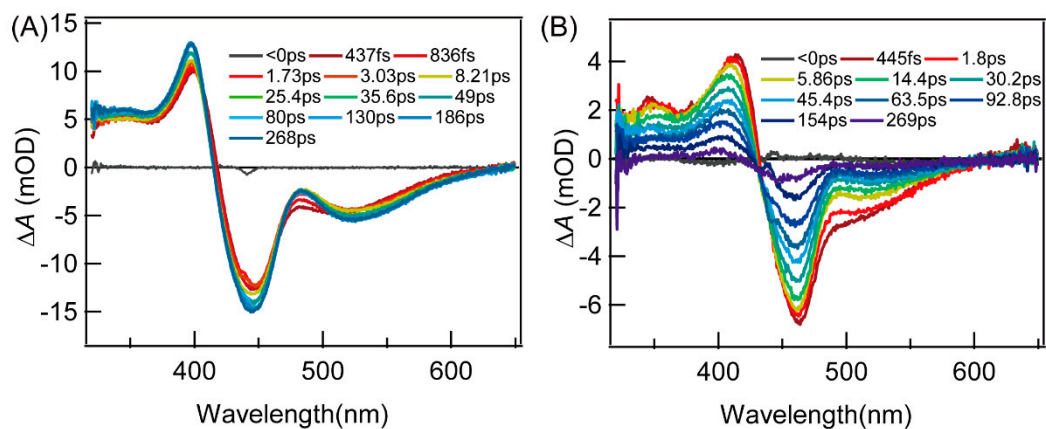

**Figure S3.** (A) Femtosecond time-resolved transient absorption spectra of the first 200 ps of proflavine (50  $\mu$ M) in buffer solution (pH=7.4); (B) Femtosecond time-resolved transient absorption spectra of the first 200 ps of the intercalation complex of PF-DNA (50  $\mu$ M) in buffer solution (pH=7.4).
